# Supplementary material for: The impact of indoor residual spraying on Plasmodium falciparum microsatellite variation in an area of high seasonal malaria transmission in Ghana, West Africa
Source: PubMed Central journal article supplement (PMC8456823; doi:10.1111/mec.16029), 2021-07-16
Supplement: MEC-30-3974-s001.pdf [file MEC-30-3974-s001.pdf]

## Supplemental Information for:

### **The impact of indoor residual spraying on *Plasmodium falciparum* microsatellite variation in an area of high seasonal malaria transmission in Ghana, West Africa**

Dionne C. Argyropoulos, Shazia Ruybal-Pesántez, Samantha L. Deed, Abraham R. Oduro, Samuel K. Dadzie, Maxwell A. Appawu, Victor Asoala, Mercedes Pascual, Kwadwo A. Koram, Karen P. Day, Kathryn E. Tiedje

#### Table of Contents:

|                             |         |
|-----------------------------|---------|
| <b>Supplemental Tables</b>  |         |
| Table S1                    | Page 2  |
| Table S2                    | Page 3  |
| Table S3                    | Page 4  |
| Table S4                    | Page 5  |
| Table S5                    | Page 6  |
| Table S6                    | Page 7  |
| Table S7                    | Page 8  |
| Table S8                    | Page 9  |
| Table S9                    | Page 11 |
| Table S10                   | Page 12 |
| Table S11                   | Page 13 |
| Table S12                   | Page 14 |
| Table S13                   | Page 15 |
| <b>Supplemental Figures</b> |         |
| Figure S1                   | Page 16 |
| Figure S2                   | Page 17 |
| Figure S3                   | Page 18 |
| Figure S4                   | Page 19 |
| Figure S5                   | Page 20 |
| <b>Supplemental Methods</b> | Page 21 |
| <b>References</b>           | Page 23 |

## SUPPLEMENTAL TABLES

**Table S1.** Participant reported intervention use pre-IRS (T1, October 2012) and post-IRS (T2, October 2015) for the whole population surveyed and for those participants with microscopic *P. falciparum* infections.

| Characteristic                                       | Pre-IRS (T1, Oct 2012) | Post-IRS (T2, Oct 2015) | <i>P</i> -value |
|------------------------------------------------------|------------------------|-------------------------|-----------------|
| <b>Total Population *</b>                            | 1923                   | 2022                    |                 |
| Reported LLIN usage †                                |                        |                         | 0.126           |
| Yes                                                  | 1713 (89.1)            | 1831 (90.6)             |                 |
| No                                                   | 210 (10.9)             | 191 (9.4)               |                 |
| Reported antimalarial usage ‡                        |                        |                         | <0.001          |
| Yes                                                  | 796 (41.4)             | 298 (14.7)              |                 |
| No                                                   | 1127 (58.6)            | 1724 (85.3)             |                 |
| <b>Microscopic <i>P. falciparum</i> infections *</b> | 808                    | 545                     |                 |
| Reported LLIN usage †                                |                        |                         | 0.857           |
| Yes                                                  | 712 (88.1)             | 482 (91.2)              |                 |
| No                                                   | 96 (11.9)              | 63 (8.8)                |                 |
| Reported antimalarial usage ‡                        |                        |                         | <0.001          |
| Yes                                                  | 322 (39.9)             | 74 (13.6)               |                 |
| No                                                   | 486 (60.1)             | 471 (86.4)              |                 |

LLIN = long-lasting insecticidal nets

\* Data reflect No. (% (n/N)) of participants.

† Participant self-reported LLIN usage the previous night

‡ Participant self-reported antimalarial treatment in the two-weeks prior to being surveyed.

**Table S2.** Microsatellite genotyping success for pre-IRS (T1, N=200) and post-IRS (T2, N=200).

| Marker | Chr | Genotype Success (%) |               |
|--------|-----|----------------------|---------------|
|        |     | Pre-IRS (T1)         | Post-IRS (T2) |
| POLYA  | 4   | 88.9                 | 97.0          |
| TA81   | 5   | 94.0                 | 95.0          |
| TA42   | 5   | 69.9                 | 26.5          |
| TA1    | 6   | 69.0                 | 86.0          |
| TA109  | 6   | 98.1                 | 98.0          |
| TA87   | 6   | 95.8                 | 98.5          |
| TA40   | 10  | 78.2                 | 96.0          |
| 2490   | 10  | 85.6                 | 78.5          |
| ARA2   | 11  | 88.9                 | 80.0          |
| PFG377 | 12  | 93.1                 | 89.5          |
| PFPK2  | 12  | 92.6                 | 96.0          |
| TA60   | 13  | 90.3                 | 90.5          |
| Median |     | 89.6                 | 92.8          |

**Table S3.** Demographics and parasitological characteristics of the study population in Bongo collected for the pre-IRS (T1, October 2012) and post-IRS (T2, October 2015) surveys.

| Characteristic                                 | Pre-IRS (T1, Oct 2012) | Post-IRS (T2, Oct 2015) | P-value |
|------------------------------------------------|------------------------|-------------------------|---------|
| <b>Total Population</b>                        | 1923                   | 2022                    |         |
| Age Groups *                                   |                        |                         | 0.221   |
| 1 – 5 years                                    | 356 (18.5)             | 405 (20.0)              |         |
| 6 – 10 years                                   | 395 (20.5)             | 409 (20.2)              |         |
| 11 – 20 years                                  | 413 (21.5)             | 467 (23.1)              |         |
| 21 – 39 years                                  | 326 (17.0)             | 297 (14.7)              |         |
| ≥ 40 years                                     | 433 (22.5)             | 444 (22.0)              |         |
| Sex *                                          |                        |                         | 0.781   |
| Female                                         | 1031 (53.6)            | 1093 (54.1)             |         |
| Male                                           | 892 (46.4)             | 929 (45.9)              |         |
| Catchment Area *                               |                        |                         | 0.295   |
| Vea/Gowrie                                     | 919 (47.8)             | 1000 (49.5)             |         |
| Soe                                            | 1004 (52.2)            | 1022 (50.5)             |         |
| <b><i>P. falciparum</i> prevalence **</b>      |                        |                         |         |
| All                                            | 808 (42.0)             | 545 (27.0)              | <0.001  |
| Age Groups                                     |                        |                         | <0.001  |
| 1 – 5 years                                    | 173 (48.6)             | 63 (15.6)               |         |
| 6 – 10 years                                   | 243 (61.5)             | 167 (40.8)              |         |
| 11 – 20 years                                  | 202 (48.9)             | 169 (36.2)              |         |
| 21 – 39 years                                  | 84 (25.8)              | 52 (17.5)               |         |
| ≥ 40 years                                     | 106 (24.5)             | 94 (21.2)               |         |
| Sex                                            |                        |                         | 0.376   |
| Female                                         | 379 (36.8)             | 269 (24.6)              |         |
| Male                                           | 429 (48.1)             | 276 (29.7)              |         |
| Catchment Area                                 |                        |                         | 0.165   |
| Vea/Gowrie                                     | 356 (35.5)             | 261 (26.1)              |         |
| Soe                                            | 452 (45.0)             | 284 (27.8)              |         |
| <b><i>Plasmodium</i> spp. median density †</b> |                        |                         |         |
| All                                            | 520 [160 – 1640]       | 320 [120 – 1800]        | <0.001  |
| Age Groups                                     |                        |                         | <0.001  |
| 1 – 5 years                                    | 1640 [400 – 9860]      | 1840 [260 – 19940]      |         |
| 6 – 10 years                                   | 720 [240 – 1840]       | 520 [200 – 2720]        |         |
| 11 – 20 years                                  | 320 [160 – 760]        | 280 [120 – 1000]        |         |
| 21 – 39 years                                  | 200 [120 – 720]        | 200 [80 – 1730]         |         |
| ≥ 40 years                                     | 200 [120 – 670]        | 120 [40 – 320]          |         |
| Sex                                            |                        |                         | 0.006   |
| Female                                         | 520 [160 – 1640]       | 320 [80 – 1960]         |         |
| Male                                           | 480 [160 – 1610]       | 320 [120 – 1300]        |         |
| Catchment                                      |                        |                         | <0.001  |
| Vea/Gowrie                                     | 360 [160 – 1190]       | 240 [80 – 1280]         |         |
| Soe                                            | 680 [200 – 2180]       | 400 [120 – 2210]        |         |
| <b><i>P. falciparum</i> median MOI ‡</b>       |                        |                         |         |
| All                                            | 3 [1-4]                | 1 [1-2]                 | <0.001  |
| Age Groups                                     |                        |                         | <0.001  |
| 1 – 5 years                                    | 3 [2-5]                | 2 [1-2]                 |         |
| 6 – 10 years                                   | 3 [2-5]                | 2 [1-3]                 |         |
| 11 – 20 years                                  | 2 [1-4]                | 2 [1-2]                 |         |
| 21 – 39 years                                  | 2 [1-2.25]             | 1 [1-2]                 |         |
| ≥ 40 years                                     | 1 [1-2]                | 1 [1-1]                 |         |
| Sex                                            |                        |                         | <0.001  |
| Female                                         | 2 [1-4]                | 1 [1-2]                 |         |
| Male                                           | 3 [1-4]                | 1.5 [1-2]               |         |
| Catchment                                      |                        |                         | <0.001  |
| Vea/Gowrie                                     | 2 [1-4]                | 1 [1-2]                 |         |
| Soe                                            | 3 [2-4]                | 2 [1-3]                 |         |

IQR = inter quartile range; MOI= multiplicity of infection

\* Data reflect No. (% (n/N)) participants.

\*\* Data reflect No. (% (n/N)) of participants that were positive for *P. falciparum* (and mixed *P. falciparum*/*P. malariae*) by microscopy.

† Median parasite density for the microscopically positive *P. falciparum* (including mixed *P. falciparum*/*P. malariae* infections) (value/  $\mu$ L [IQR]) isolates.

‡ Data reflect the median estimated MOI based on *var* genotyping (see Supplemental Methods).

**Table S4.** The microscopic *P. falciparum* isolates selected for the microsatellite analyses in the pre-IRS (T1, October 2012) and post-IRS (T2, October 2015) surveys. Statistical analyses were completed to determine if there were any significant differences, with respect to any of the study variables, between those isolates selected based on MOI and those excluded.

| Characteristic                                 | Pre-IRS (T1, Oct 2012) |                    | Post-IRS (T2, Oct 2015) |                    |
|------------------------------------------------|------------------------|--------------------|-------------------------|--------------------|
|                                                | N *                    | n **               | N *                     | n **               |
| <b>All <i>P. falciparum</i> infections</b>     | 808                    | 192 (23.7)         | 545                     | 200 (36.7)         |
| Age groups                                     |                        |                    |                         |                    |
| 1 – 5 years                                    | 173 (21.4)             | 36 (20.8)          | 63 (11.6)               | 17 (27.0)          |
| 6 – 10 years                                   | 243 (30.1)             | 37 (15.2)          | 167 (30.6)              | 68 (40.7)          |
| 11 – 20 years                                  | 202 (25.0)             | 52 (25.7)          | 169 (31.0)              | 58 (34.3)          |
| 21 – 39 years                                  | 84 (10.4)              | 27 (32.1)          | 52 (9.5)                | 20 (38.5)          |
| ≥ 40 years                                     | 106 (13.1)             | 40 (37.7)          | 94 (17.3)               | 37 (39.4)          |
| <i>P</i> -value                                |                        | <0.001             |                         | 0.707              |
| Sex                                            |                        |                    |                         |                    |
| Female                                         | 379 (46.9)             | 101 (26.6)         | 269 (49.4)              | 98 (36.4)          |
| Male                                           | 429 (53.1)             | 91 (21.2)          | 276 (50.6)              | 102 (37.0)         |
| <i>P</i> -value                                |                        | 0.155              |                         | 0.931              |
| Catchment Area                                 |                        |                    |                         |                    |
| Vea/Gowrie                                     | 356 (44.1)             | 87 (24.4)          | 261 (47.9)              | 103 (39.5)         |
| Soe                                            | 452 (55.9)             | 105 (23.2)         | 284 (52.1)              | 97 (34.2)          |
| <i>P</i> -value                                |                        | 0.753              |                         | 0.382              |
| <b><i>Plasmodium</i> spp. median density †</b> |                        |                    |                         |                    |
| All                                            | 520 [160 – 1640]       | 240 [120 – 2020]   | 320 [120 – 1800]        | 320 [120 – 1190]   |
| <i>P</i> -value                                |                        | 0.7841             |                         | 0.008              |
| Age Groups                                     |                        |                    |                         |                    |
| 1-5 Years                                      | 1640 [400 – 9860]      | 6480 [230 – 46620] | 1840 [260 – 19940]      | 1640 [320 – 17280] |
| 6-10 Years                                     | 720 [240 – 1840]       | 360 [120 – 1480]   | 520 [200 – 2720]        | 360 [160 – 1430]   |
| 11-20 Years                                    | 320 [160 – 760]        | 160 [80 – 610]     | 280 [120 – 1000]        | 340 [160 – 1060]   |
| 21-39 Years                                    | 200 [120 – 720]        | 160 [80 – 740]     | 200 [80 – 1730]         | 320 [120 – 2200]   |
| 40+ Years                                      | 200 [120 – 670]        | 220 [110 – 1150]   | 120 [40 – 320]          | 120 [80 – 480]     |
| Sex                                            |                        |                    |                         |                    |
| Female                                         | 520 [160 – 1640]       | 240 [120 – 1560]   | 320 [80 – 1960]         | 320 [120 – 1520]   |
| Male                                           | 480 [160 – 1610]       | 240 [120 – 2940]   | 320 [120 – 1300]        | 360 [160 – 1080]   |
| Catchment Areas                                |                        |                    |                         |                    |
| Vea/Gowrie                                     | 360 [160 – 1190]       | 200 [120 – 1140]   | 240 [80 – 1280]         | 360 [160 – 1120]   |
| Soe                                            | 680 [200 – 2180]       | 400 [120 – 2400]   | 400 [120 – 2210]        | 320 [120 – 1280]   |

\* Data reflect No. (% N/Total number microscopically positive *P. falciparum* isolates in T1 or T2) of microscopically positive *P. falciparum* isolates.

\*\* Data reflect No. (% (n/N)) of microscopically positive *P. falciparum* isolates selected for T1 and T2.

*P*-values reflect chi-squared test comparison of the *P. falciparum* positive population N=808 (T1) and N=545 (T2) to the N=192 (T1) and N=200 (T2) microsatellite-selected population.

† Median parasite density for the microscopically positive *P. falciparum* (including mixed *P. falciparum*/*P. malariae* infections) (value/  $\mu$ L [IQR]) isolates. *P*-values reflect Kruskal-Wallis test comparison of the *P. falciparum* positive population N=808 (T1) and N=545 (T2) to the N=192 (T1) and N=200 (T2) microsatellite-selected population.

**Table S5.** Patterns of genetic diversity for the *P. falciparum* populations from Bongo for the “all infections” dataset in the pre-IRS (T1, October 2012) and post-IRS (T2, October 2015) surveys.

| Population | <i>n</i> |     | <i>h</i> |     | <i>A</i> |      |                 | <i>R<sub>s</sub></i> |      |                 | <i>H<sub>e</sub></i> |      |                  |
|------------|----------|-----|----------|-----|----------|------|-----------------|----------------------|------|-----------------|----------------------|------|------------------|
|            | T1       | T2  | T1       | T2  | T1       | T2   | <i>P-value*</i> | T1                   | T2   | <i>P-value*</i> | T1                   | T2   | <i>P-value**</i> |
| Vea/Gowrie | 87       | 104 | 87       | 103 | 10.5     | 11.4 | 0.89            | 8.9                  | 10.6 | 0.96            | 0.78                 | 0.81 | 0.01             |
| Soe        | 105      | 96  | 105      | 96  | 10.8     | 11.0 | 0.98            | 8.6                  | 10.3 | 0.98            | 0.78                 | 0.80 | 0.12             |
| Total      | 192      | 200 | 192      | 199 | 12.0     | 12.9 | 0.90            | 10.8                 | 12.4 | 0.94            | 0.78                 | 0.81 | 0.01             |

*n* = number of isolates; *h* = number of haplotypes; *A* = mean number of alleles per locus;

*R<sub>s</sub>* = allelic richness estimate; *H<sub>e</sub>* = expected heterozygosity.

*P-value* = T1 and T2 comparison. \**P-values* calculated by chi-square test. \*\**P-value* calculated by “Hs.test” function.

**Table S6.** Allelic size range, number of alleles, private alleles and allele frequency for the “all infections” dataset for the 10 microsatellite loci in the pre-IRS (T1, October 2012) and post-IRS (T2, October 2015) surveys.

| Marker | Chr | N   |     | Allele Range |           | Alleles per locus |    | Private Alleles |    | Allele Frequency |
|--------|-----|-----|-----|--------------|-----------|-------------------|----|-----------------|----|------------------|
|        |     | T1  | T2  | T1           | T2        | T1                | T2 | T1              | T2 | <i>P-value</i>   |
| POLYA  | 4   | 173 | 194 | 133 – 184    | 112 – 190 | 18                | 22 | 1               | 5  | 0.310            |
| TA81   | 5   | 185 | 190 | 104 – 134    | 104 – 137 | 11                | 12 | 0               | 1  | 0.680            |
| TA109  | 6   | 190 | 196 | 148 – 199    | 148 – 217 | 17                | 17 | 2               | 2  | 0.870            |
| TA87   | 6   | 188 | 197 | 74 – 116     | 71 – 122  | 11                | 14 | 1               | 4  | 0.200            |
| TA40   | 10  | 152 | 192 | 203 – 290    | 209 – 266 | 20                | 18 | 5               | 3  | 0.900            |
| 2490   | 10  | 167 | 157 | 74 – 89      | 74 – 89   | 5                 | 5  | 0               | 0  | 0.660            |
| ARA2   | 11  | 172 | 160 | 60 – 84      | 60 – 87   | 9                 | 10 | 0               | 1  | 0.014*           |
| PFG377 | 12  | 182 | 179 | 89 – 104     | 89 – 104  | 6                 | 6  | 0               | 0  | <0.001***        |
| PFPK2  | 12  | 181 | 192 | 152 – 188    | 152 – 197 | 13                | 14 | 0               | 1  | 0.860            |
| TA60   | 13  | 176 | 181 | 68 – 95      | 65 – 98   | 10                | 11 | 1               | 2  | <0.001***        |

Genetic characteristics of 392 infections (“all infections” dataset) using 10 microsatellite loci from T1 (*N* = 192) and T2 (*N* = 200).

*N* = number of isolates.

Private Allele comparisons are between T1 to T2. Allele Frequency comparison by Mann-Whitney U Test. \*\*\* *P* < 0.001, \* *P* < 0.05.

**Table S7.** Allelic size range, number of alleles, private alleles and allele frequency for the “dominant infections” dataset for the 10 microsatellite loci in the pre-IRS (T1, October 2012) and post-IRS (T2, October 2015) surveys.

| Marker | Chr | N   |     | Allele Range |           | Alleles per locus |    | Private Alleles |    | Allele Frequency |
|--------|-----|-----|-----|--------------|-----------|-------------------|----|-----------------|----|------------------|
|        |     | T1  | T2  | T1           | T2        | T1                | T2 | T1              | T2 | <i>P-value</i>   |
| POLYA  | 4   | 115 | 151 | 136 – 184    | 112 – 190 | 17                | 21 | 1               | 5  | 0.190            |
| TA81   | 5   | 123 | 149 | 104 – 154    | 107 – 137 | 11                | 11 | 1               | 1  | 0.340            |
| TA109  | 6   | 126 | 153 | 148 – 199    | 154 – 217 | 17                | 15 | 3               | 2  | 0.850            |
| TA87   | 6   | 124 | 153 | 74 – 116     | 71 – 122  | 11                | 14 | 1               | 4  | 0.050*           |
| TA40   | 10  | 109 | 150 | 203 – 290    | 215 – 266 | 19                | 17 | 5               | 3  | 0.800            |
| 2490   | 10  | 110 | 127 | 74 – 89      | 74 – 89   | 5                 | 5  | 0               | 0  | 0.200            |
| ARA2   | 11  | 112 | 123 | 60 – 81      | 60 – 87   | 8                 | 10 | 0               | 2  | 0.040*           |
| PFG377 | 12  | 119 | 143 | 89 – 104     | 89 – 104  | 6                 | 6  | 0               | 0  | <0.001***        |
| PFPK2  | 12  | 121 | 151 | 152 – 188    | 152 – 197 | 13                | 14 | 0               | 1  | 0.740            |
| TA60   | 13  | 117 | 140 | 71 – 95      | 65 – 98   | 8                 | 11 | 0               | 3  | 0.030*           |

Genetic characteristics of 284 infections (“dominant infections” dataset) using 10 microsatellite loci from T1 (*N* = 128) and T2 (*N* = 156).

*N* = number of isolates.

Private Allele comparisons are between T1 to T2. Allele Frequency comparison by Mann-Whitney U Test. \*\*\**P* < 0.001, \*\**P* < 0.01, \**P* < 0.05.



**Table S8.** Allele frequencies at 10 microsatellite loci for “all infections” and “dominant infections” datasets in the pre-IRS (T1, October 2012) and post-IRS (T2, October 2015) surveys.

| Marker | bp  | All Infections |               | Dominant Infections |               |      |       |        |       |       |
|--------|-----|----------------|---------------|---------------------|---------------|------|-------|--------|-------|-------|
|        |     | Pre-IRS (T1)   | Post-IRS (T2) | Pre-IRS (T1)        | Post-IRS (T2) |      |       |        |       |       |
| POLYA  |     | N=173          | N=194         | N=115               | N=151         |      |       |        |       |       |
|        | 112 | -              | 0.005         | -                   | 0.007         | 154  | 0.011 | 0.005  | 0.016 | 0.007 |
|        | 115 | -              | 0.010         | -                   | 0.013         | 157  | 0.005 | -      | 0.008 | -     |
|        | 130 | -              | 0.010         | -                   | 0.013         | 160  | 0.216 | 0.235  | 0.198 | 0.216 |
|        | 133 | 0.006          | -             | -                   | -             | 163  | 0.127 | 0.143  | 0.143 | 0.150 |
|        | 136 | 0.017          | 0.036         | 0.017               | 0.033         | 166  | 0.005 | 0.026  | 0.008 | 0.033 |
|        | 139 | 0.023          | 0.021         | 0.017               | 0.013         | 169  | 0.011 | 0.010  | 0.016 | 0.007 |
|        | 142 | 0.029          | 0.026         | 0.026               | 0.026         | 172  | 0.184 | 0.153  | 0.206 | 0.163 |
|        | 145 | 0.035          | 0.046         | 0.035               | 0.046         | 175  | 0.247 | 0.281  | 0.230 | 0.275 |
|        | 148 | 0.069          | 0.067         | 0.070               | 0.066         | 178  | 0.032 | 0.015  | 0.032 | 0.020 |
|        | 151 | 0.168          | 0.196         | 0.148               | 0.185         | 181  | 0.005 | 0.020  | 0.008 | 0.026 |
|        | 154 | 0.179          | 0.113         | 0.174               | 0.113         | 184  | 0.016 | -      | 0.024 | -     |
|        | 157 | 0.075          | 0.103         | 0.104               | 0.113         | 187  | 0.011 | 0.026  | 0.016 | 0.026 |
|        | 160 | 0.087          | 0.088         | 0.061               | 0.099         | 190  | 0.011 | 0.005  | 0.016 | -     |
|        | 163 | 0.110          | 0.093         | 0.122               | 0.079         | 193  | 0.005 | 0.055  | 0.008 | 0.007 |
|        | 166 | 0.052          | 0.031         | 0.052               | 0.033         | 196  | 0.074 | 0.051  | 0.048 | 0.046 |
|        | 169 | 0.029          | 0.052         | 0.035               | 0.040         | 199  | 0.021 | 0.010  | 0.016 | 0.013 |
|        | 172 | 0.040          | 0.031         | 0.026               | 0.046         | 208  | -     | -      | -     | -     |
|        | 175 | 0.023          | 0.031         | 0.035               | 0.026         | 214  | -     | 0.005  | -     | 0.007 |
|        | 178 | 0.029          | 0.005         | 0.035               | -             | 217  | -     | 0.005  | -     | 0.007 |
|        | 181 | 0.012          | 0.010         | 0.017               | 0.013         | TA87 | N=188 | N=197  | N=124 | N=153 |
|        | 184 | 0.017          | 0.005         | 0.026               | 0.007         | 71   | -     | 0.005  | -     | 0.007 |
|        | 187 | -              | 0.015         | -                   | 0.020         | 74   | 0.011 | -      | 0.016 | -     |
|        | 190 | -              | 0.005         | -                   | 0.007         | 80   | -     | -      | -     | -     |
| TA81   |     | N=185          | N=190         | N=123               | N=149         | 83   | -     | -      | -     | -     |
|        | 104 | 0.005          | 0.0053        | 0.008               | -             | 86   | -     | 0.011  | -     | 0.007 |
|        | 107 | 0.011          | 0.005         | 0.008               | 0.007         | 89   | 0.032 | 0.051  | 0.040 | 0.052 |
|        | 110 | 0.022          | 0.005         | 0.024               | 0.007         | 92   | 0.043 | 0.020  | 0.048 | 0.026 |
|        | 113 | 0.032          | 0.047         | 0.033               | 0.047         | 95   | 0.202 | 0.127  | 0.226 | 0.118 |
|        | 116 | 0.168          | 0.226         | 0.197               | 0.242         | 98   | 0.133 | 0.1422 | 0.161 | 0.131 |
|        | 119 | 0.222          | 0.211         | 0.195               | 0.228         | 101  | 0.202 | 0.228  | 0.161 | 0.229 |
|        | 122 | 0.324          | 0.247         | 0.341               | 0.248         | 104  | 0.165 | 0.173  | 0.121 | 0.190 |
|        | 125 | 0.059          | 0.074         | 0.065               | 0.081         | 107  | 0.138 | 0.142  | 0.153 | 0.144 |
|        | 128 | 0.103          | 0.137         | 0.081               | 0.107         | 110  | 0.053 | 0.051  | 0.048 | 0.039 |
|        | 131 | 0.038          | 0.032         | 0.041               | 0.020         | 113  | 0.011 | 0.025  | 0.016 | 0.026 |
|        | 134 | 0.016          | 0.005         | 0.024               | 0.007         | 116  | 0.011 | 0.015  | 0.008 | 0.020 |
|        | 137 | -              | 0.005         | -                   | 0.007         | 119  | -     | 0.005  | -     | 0.007 |
| TA109  |     | N=190          | N=196         | N=126               | N=153         | 122  | -     | 0.005  | -     | 0.007 |
|        | 148 | 0.021          | 0.005         | 0.008               | -             | 125  | -     | -      | -     | -     |
|        | 151 | -              | -             | -                   | -             | TA40 | N=152 | N=192  | N=109 | N=150 |
|        |     |                |               |                     |               | 203  | 0.007 | -      | 0.009 | -     |
|        |     |                |               |                     |               | 206  | -     | -      | -     | -     |
|        |     |                |               |                     |               | 209  | 0.007 | 0.016  | -     | -     |
|        |     |                |               |                     |               | 212  | 0.007 | -      | 0.009 | -     |

Continued next page.

|      |       |       |       |       |
|------|-------|-------|-------|-------|
| 215  | 0.026 | 0.016 | 0.009 | 0.020 |
| 218  | -     | 0.005 | -     | 0.007 |
| 221  | 0.059 | 0.104 | 0.073 | 0.087 |
| 224  | 0.053 | 0.031 | 0.064 | 0.033 |
| 227  | 0.079 | 0.099 | 0.083 | 0.107 |
| 230  | 0.007 | 0.016 | 0.009 | 0.007 |
| 233  | 0.013 | 0.016 | 0.018 | 0.013 |
| 236  | 0.020 | 0.010 | 0.009 | 0.013 |
| 239  | 0.039 | 0.042 | 0.037 | 0.053 |
| 242  | 0.224 | 0.172 | 0.211 | 0.173 |
| 245  | 0.263 | 0.177 | 0.257 | 0.193 |
| 248  | 0.046 | 0.172 | 0.046 | 0.167 |
| 251  | 0.026 | 0.031 | 0.018 | 0.033 |
| 254  | 0.072 | 0.047 | 0.083 | 0.040 |
| 257  | -     | 0.021 | -     | 0.027 |
| 260  | 0.026 | 0.021 | 0.028 | 0.020 |
| 263  | 0.013 | -     | 0.018 | -     |
| 266  | -     | 0.005 | -     | 0.007 |
| 272  | -     | -     | -     | -     |
| 281  | 0.007 | -     | 0.009 | -     |
| 287  | -     | -     | -     | -     |
| 290  | 0.007 | -     | 0.009 | -     |
| 2490 | N=167 | N=157 | N=110 | N=127 |
| 74   | 0.024 | 0.045 | 0.018 | 0.039 |
| 80   | 0.240 | 0.261 | 0.291 | 0.244 |
| 83   | 0.689 | 0.055 | 0.636 | 0.559 |
| 86   | 0.018 | 0.121 | 0.027 | 0.126 |
| 89   | 0.030 | 0.025 | 0.027 | 0.031 |
| ARA2 | N=172 | N=160 | N=112 | N=123 |
| 60   | 0.105 | 0.081 | 0.134 | 0.089 |
| 63   | 0.076 | 0.069 | 0.080 | 0.089 |
| 66   | 0.302 | 0.250 | 0.304 | 0.252 |
| 69   | 0.186 | 0.138 | 0.188 | 0.163 |
| 72   | 0.163 | 0.163 | 0.161 | 0.138 |
| 75   | 0.105 | 0.138 | 0.080 | 0.114 |
| 78   | 0.029 | 0.088 | 0.018 | 0.089 |
| 81   | 0.029 | 0.031 | 0.038 | 0.033 |
| 84   | 0.006 | 0.025 | -     | 0.024 |
| 87   | -     | 0.019 | -     | 0.008 |

|        |       |       |       |       |
|--------|-------|-------|-------|-------|
| PFG377 | N=182 | N=179 | N=119 | N=143 |
| 89     | 0.027 | 0.006 | 0.034 | 0.007 |
| 92     | 0.099 | 0.034 | 0.101 | 0.028 |
| 95     | 0.264 | 0.218 | 0.277 | 0.189 |
| 98     | 0.549 | 0.553 | 0.513 | 0.587 |
| 101    | 0.038 | 0.078 | 0.042 | 0.077 |
| 104    | 0.022 | 0.112 | 0.034 | 0.112 |
| PFPK2  | N=181 | N=192 | N=121 | N=151 |
| 152    | 0.006 | 0.010 | 0.008 | 0.013 |
| 155    | 0.017 | 0.016 | 0.008 | 0.013 |
| 158    | 0.105 | 0.120 | 0.107 | 0.132 |
| 161    | 0.166 | 0.182 | 0.140 | 0.152 |
| 164    | 0.309 | 0.245 | 0.331 | 0.238 |
| 167    | 0.133 | 0.151 | 0.116 | 0.172 |
| 170    | 0.088 | 0.104 | 0.091 | 0.106 |
| 173    | 0.050 | 0.057 | 0.066 | 0.060 |
| 176    | 0.033 | 0.026 | 0.041 | 0.033 |
| 179    | 0.033 | 0.042 | 0.025 | 0.040 |
| 182    | 0.022 | 0.021 | 0.025 | 0.020 |
| 185    | 0.022 | 0.016 | 0.025 | 0.007 |
| 188    | 0.017 | 0.005 | 0.017 | 0.007 |
| 191    | -     | -     | -     | -     |
| 194    | -     | -     | -     | -     |
| 197    | -     | 0.005 | -     | 0.007 |
| TA60   | N=176 | N=181 | N=117 | N=140 |
| 65     | -     | 0.028 | -     | 0.029 |
| 68     | 0.017 | -     | -     | -     |
| 71     | 0.244 | 0.127 | 0.231 | 0.136 |
| 74     | 0.233 | 0.149 | 0.222 | 0.157 |
| 77     | 0.028 | 0.055 | 0.034 | 0.043 |
| 80     | 0.239 | 0.298 | 0.231 | 0.279 |
| 83     | 0.176 | 0.177 | 0.222 | 0.186 |
| 86     | 0.028 | 0.110 | 0.017 | 0.107 |
| 89     | 0.017 | 0.017 | 0.026 | 0.021 |
| 92     | 0.006 | 0.011 | -     | 0.007 |
| 95     | 0.011 | 0.011 | 0.017 | 0.014 |
| 98     | -     | 0.017 | -     | 0.021 |

**Table S9.** Patterns of genetic diversity for the *P. falciparum* populations per catchment area for the “dominant infections” dataset by locus in the pre-IRS (T1, October 2012) and post-IRS (T2, October 2015) surveys.

| Locus   | Pre-IRS<br>(T1, October 2012) |       | Post-IRS<br>(T2, October 2015) |       |
|---------|-------------------------------|-------|--------------------------------|-------|
|         | $H_e$                         |       | $H_e$                          |       |
|         | Vea/Gowrie                    | Soe   | Vea/Gowrie                     | Soe   |
| POLYA   | 0.916                         | 0.902 | 0.918                          | 0.898 |
| TA81    | 0.825                         | 0.782 | 0.797                          | 0.821 |
| TA109   | 0.813                         | 0.865 | 0.836                          | 0.788 |
| TA87    | 0.855                         | 0.835 | 0.861                          | 0.842 |
| TA40    | 0.865                         | 0.845 | 0.849                          | 0.888 |
| 2490    | 0.446                         | 0.542 | 0.656                          | 0.553 |
| ARA2    | 0.832                         | 0.807 | 0.873                          | 0.830 |
| PFG377  | 0.697                         | 0.611 | 0.570                          | 0.631 |
| PFPK2   | 0.819                         | 0.841 | 0.866                          | 0.849 |
| TA60    | 0.772                         | 0.801 | 0.807                          | 0.847 |
| Overall | 0.784                         | 0.783 | 0.803                          | 0.794 |

$H_e$  = expected heterozygosity.

Genetic characteristics of 284 infections (“dominant infections” dataset) using 10 microsatellite loci from T1 ( $N = 128$ ) and T2 ( $N = 156$ ). The “overall” row refers to the total  $H_e$  for the catchment area. See Figure 1A for location of Vea/Gowrie and Soe catchment areas.

**Table S10.** Population bottleneck analysis by locus for the two survey time points using the Stepwise-Mutation Model (SMM) in the pre-IRS (T1, October 2012) and post-IRS (T2, October 2015) surveys.

| Locus   | Model | Pre-IRS (T1) |       |   | Post-IRS (T2) |       |   |
|---------|-------|--------------|-------|---|---------------|-------|---|
|         |       | $H_e$        | SMM   |   | $H_e$         | SMM   |   |
| POLYA   | SMM   | 0.907        | 0.468 | E | 0.912         | 0.174 | D |
| TA81    | IAM   | 0.802        | 0.092 | D | 0.810         | 0.105 | D |
| TA109   | SMM   | 0.843        | 0.005 | D | 0.826         | 0.012 | D |
| TA87    | IAM   | 0.855        | 0.470 | E | 0.857         | 0.130 | D |
| TA40    | SMM   | 0.864        | 0.001 | D | 0.880         | 0.109 | D |
| 2490    | IAM   | 0.511        | 0.072 | D | 0.612         | 0.256 | D |
| ARA2    | IAM   | 0.818        | 0.300 | E | 0.856         | 0.245 | E |
| PFG377  | IAM   | 0.649        | 0.165 | D | 0.602         | 0.085 | D |
| PFPK2   | IAM   | 0.833        | 0.064 | D | 0.857         | 0.123 | D |
| TA60    | IAM   | 0.796        | 0.479 | E | 0.832         | 0.283 | D |
| Overall |       |              | 0.984 |   |               | 0.999 |   |

$H_e$ : Heterozygosity;  $H_e$  excess (*E*) is the transient increase in the expected heterozygosity compared to that observed for the population, while  $H_e$  deficiency (*D*) is a lower expected heterozygosity than observed. *P* value tests an excess of  $H_e$  via a Wilcoxon signed-rank test calculated by BOTTLENECK v. 1.2.02.

**Table S11.** Number of loci with excess or deficiency in the heterozygosity ( $H_e$ ) relative to the heterozygosity at mutation-drift equilibrium ( $H_{eq}$ ) in the *P. falciparum* populations in the Bongo catchment areas in the pre-IRS (T1, October 2012) and post-IRS (T2, October 2015) surveys.

| Population                         | $H_e$ excess | $H_e$ deficiency | <i>P</i> -value | Mode shift |
|------------------------------------|--------------|------------------|-----------------|------------|
| <b>Pre-IRS (T1, October 2012)</b>  |              |                  |                 |            |
| Vea/Gowrie                         | 4            | 6                | 0.862           | Normal     |
| Soe                                | 4            | 6                | 0.947           | Normal     |
| <b>Post-IRS (T1, October 2015)</b> |              |                  |                 |            |
| Vea/Gowrie                         | 2            | 8                | 0.947           | Normal     |
| Soe                                | 4            | 6                | 0.947           | Normal     |

*P*-value test as an excess of  $H_e$  calculated as a Wilcoxon sign-rank test; Normal: L-shaped distribution = non-bottlenecked population, Shifted: shifted mode = bottlenecked population.

NOTE:  $H_e$  excess is the transient increase in  $H_{eq}$  compared to  $H_e$  observed for the population, while  $H_e$  deficiency is a lower  $H_{exp}$  than  $H_e$  observed. These data were subject to mutation drift equilibrium via SMM and mode-shift analyses (BOTTLENECK v. 1.2.02).

**Table S12.** Number of Pairwise Allele Sharing ( $P_{AS}$ ) comparisons within (i.e., pre- and post-IRS) and between (i.e., pre- vs. post-IRS) the time point surveys investigated for the “dominant infections” with complete haplotypes.

| $P_{AS}$ score                 | Pre-IRS (T1)    | Post-IRS (T2)   | Pre- vs. Post-IRS (T1 vs. T2) |
|--------------------------------|-----------------|-----------------|-------------------------------|
| Number of pairwise comparisons | 3,240           | 3,486           | 6,804                         |
| 0.0                            | 295 (9.1)       | 370 (10.6)      | 669 (9.8)                     |
| 0.1                            | 831 (25.6)      | 979 (28.1)      | 1835 (27.0)                   |
| 0.2                            | 992 (30.6)      | 1106 (31.7)     | 2141 (31.5)                   |
| 0.3                            | 726 (22.4)      | 665 (19.1)      | 1428 (21.0)                   |
| 0.4                            | 298 (9.2)       | 273 (7.8)       | 559 (8.2)                     |
| 0.5                            | 68 (2.1)        | 78 (2.2)        | 135 (2.0)                     |
| 0.6                            | 25 (0.8)        | 12 (0.3)        | 34 (0.5)                      |
| 0.7                            | 3 (0.09)        | 1 (0.02)        | 3 (0.04)                      |
| 0.8                            | 2 (0.06)        | 1 (0.02)        | -                             |
| 0.9                            | -               | -               | -                             |
| 1.0                            | -               | 1 (0.02)        | -                             |
| Median $P_{AS}$ [min – max]    | 0.2 [0.0 – 0.8] | 0.2 [0.0 – 1.0] | 0.2 [0.0 – 0.7]               |

\* Data reflect No. (% ( $n/N$ )) of pairwise comparisons within each group, i.e., T1, T2 and T1 vs. T2.

**Table S13.** Genetic differentiation ( $G_{ST}$  and Jost's  $D$ ) of *P. falciparum* populations from Bongo in the pre-IRS (T1, October 2012) and post-IRS (T2, October 2015) surveys by locus for the "dominant infections" dataset.

| Locus  | Chr | Pre- to Post-IRS (T1 to T2) |            |                          |            |
|--------|-----|-----------------------------|------------|--------------------------|------------|
|        |     | $G_{ST}$                    | $P$ -value | Jost's $D$               | $P$ -value |
| POLA   | 4   | 0.0014                      | 0.542      | 0.0291                   | 0.519      |
| TA81   | 5   | 0.0031                      | 0.236      | 0.0258                   | 0.244      |
| TA109  | 6   | 0.0002                      | 0.770      | 0.0016                   | 0.790      |
| TA87   | 6   | 0.0050                      | 0.081      | 0.0595                   | 0.073      |
| TA40   | 10  | 0.0054                      | 0.057      | 0.0739                   | 0.054      |
| 2490   | 10  | 0.0060                      | 0.131      | 0.0155                   | 0.130      |
| ARA2   | 11  | 0.0017                      | 0.503      | 0.0172                   | 0.510      |
| PFG377 | 12  | 0.0087                      | 0.041*     | 0.0293                   | 0.036*     |
| PFPK2  | 12  | 0.0021                      | 0.376      | 0.0235                   | 0.355      |
| TA60   | 13  | 0.0061                      | 0.076      | 0.0539                   | 0.067      |
| Mean   |     | 0.00397 [0.0026 – 0.0058]   | 0.021*     | 0.0329 [0.0209 – 0.0473] | 0.034*     |

[ ]: 95% confidence interval; \* $P < 0.05$

## SUPPLEMENTAL FIGURES.

|                                                                                             | T1<br>Pre IRS, October 2012 | T2<br>Post-IRS, October 2015 | Total     |
|---------------------------------------------------------------------------------------------|-----------------------------|------------------------------|-----------|
| All participants                                                                            | N = 1,923                   | N = 2,022                    | N = 3,945 |
| <i>Plasmodium falciparum</i><br>microscopy positive participants                            | N = 808                     | N = 545                      | N = 1,353 |
| Isolates with selected<br>microsatellite genotyping*                                        | N = 200                     | N = 200                      | N = 400   |
| Isolates included for microsatellite<br>genotyping analyses (“all<br>infections” dataset) † | N = 192                     | N = 200                      | N = 392   |
| “Dominant infections” dataset<br>(MOI 1 or 2) ‡                                             | N = 128                     | N = 156                      | N = 284   |
| “Dominant infections” with<br>complete haplotypes <sup>α</sup>                              | N = 81                      | N = 84                       | N = 165   |

**Figure S1.** Data used for epidemiological and population genetics analysis.

\*Selected  $N = 200$  isolates with an MOI = 1 or 2 based on *var* genotyping (see Supplemental Methods).

† Multilocus haplotypes with greater than or equal to three alleles at the 10 microsatellite loci with > 75% genotype success.

‡ MOI based on the number of clones detected by microsatellite genotyping.

<sup>α</sup> Haplotypes were considered “complete” if there was an allele at each of the 10 microsatellite loci.



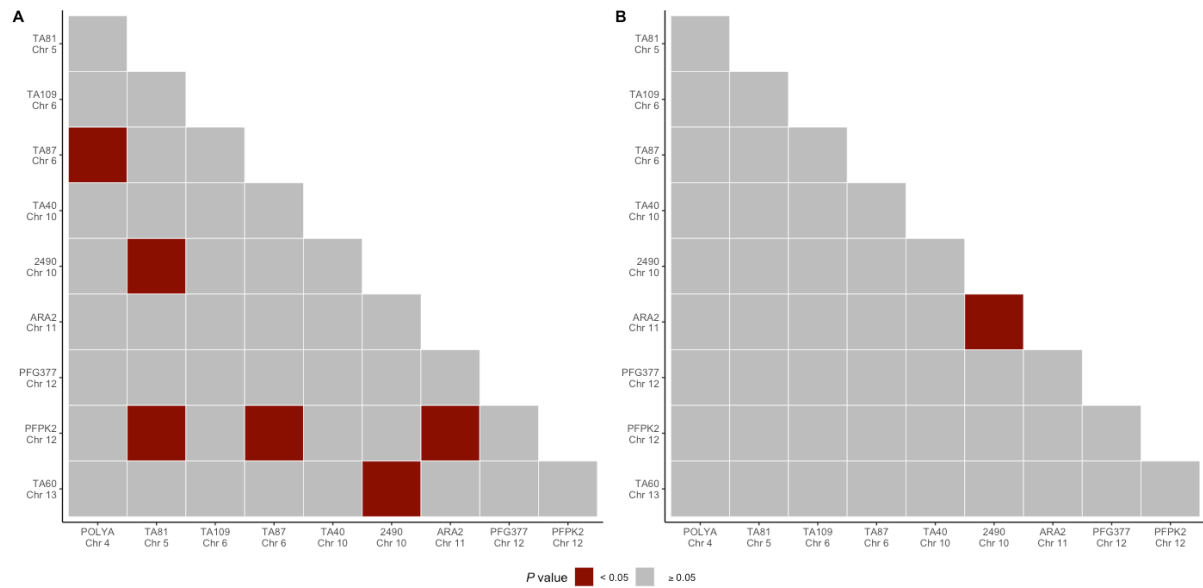

**Figure S2.** Pairwise linkage disequilibrium ( $\bar{r}_d$ ) for dominant infections with complete haplotypes in **(A)** Pre-IRS (T1, October 2012) (N = 81) and **(B)** Post-IRS (T2, October 2015) (N = 84). The colour key provided corresponds to the  $P$  value for each pairwise comparison where grey indicates a non-significant  $P$  value ( $P > 0.05$ ) and red represents significant  $P$  values ( $P < 0.05$ ).

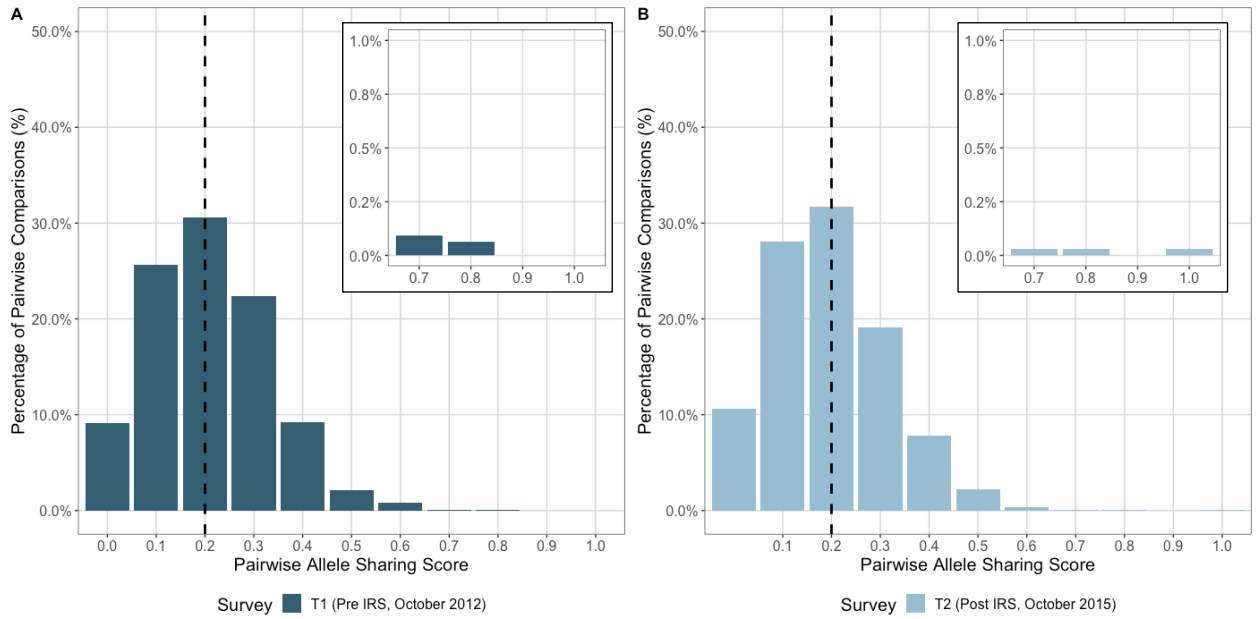

**Figure S3.** Distribution of the pairwise allele sharing ( $P_{AS}$ ) scores between the dominant infections with complete haplotypes in **(A)** Pre-IRS (T1, October 2012) and **(B)** Post-IRS (T2, October 2015). The  $P_{AS}$  score is represented as a proportion (in %) of the number of alleles shared between two haplotypes divided by the total number of loci considered (i.e., 10) (see Materials and Methods). The median was  $P_{AS} = 0.2$  in both pre- and post-IRS survey and is represented by the black dotted line. The  $P_{AS}$  scores between 0.7 to 1.0 are shown in the upper right insert. Pre-IRS (T1) there were 81 haplotypes and 3,240 pairwise comparisons, and post-IRS (T2) there were 84 haplotypes and 3,486 pairwise comparisons.

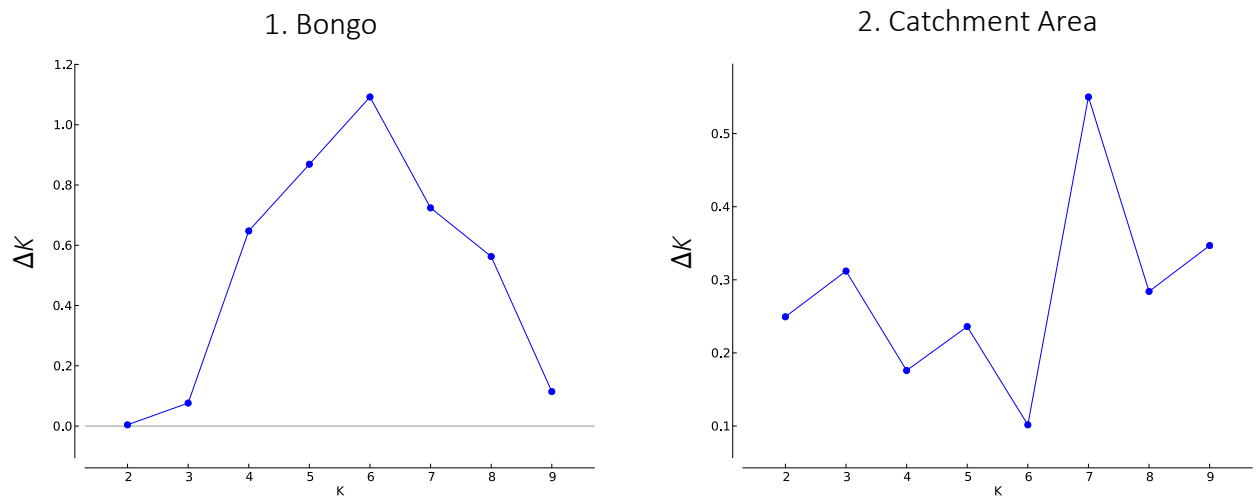

**Figure S4.**  $\Delta K$  values generated from STRUCTURE Harvester v. 0.6.94 (Earl and vonHoldt, 2012). The highest  $\Delta K$  value from the pre- to post-IRS time points (T1 to T2) and spatial levels (1. Bongo and 2. Catchment Area) were used to plot the optimal  $K$  clusters in Figure S5.

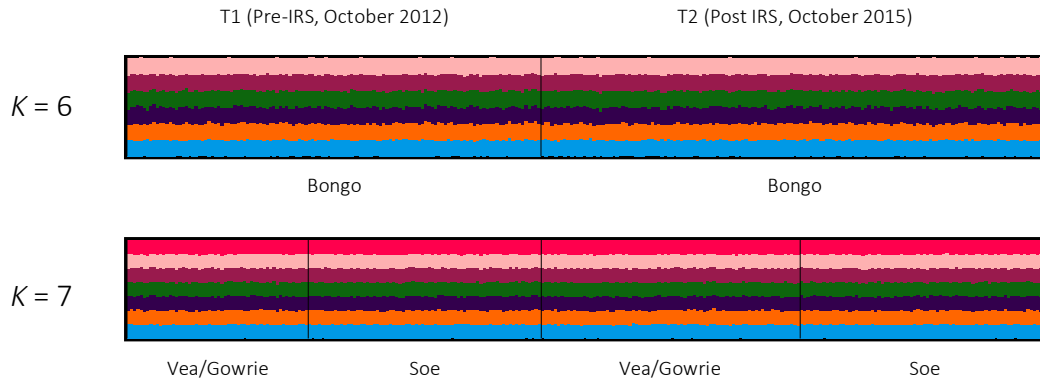

**Figure S5.** Bayesian cluster analysis of the *P. falciparum* microsatellite haplotypes from Bongo over time. STRUCTURE v. 2.3.4 software (Pritchard et al., 2000) was used to find and cluster populations within the dominant *P. falciparum* infections with complete haplotypes pre-IRS (T1, October 2012) and post-IRS (T2, October 2015). The analyses were run for  $K$  genetic clusters and 100,000 Markov chain Monte Carlo (MCMC) iterations, after a burn-in period of 100,000 using the admixture model and correlated allele frequencies. *P. falciparum* haplotypes were assigned to a defined number of genetic clusters ( $K$ ) based on genetic distance, where the optimal  $K$  found by the Evanno *et al.* (2005) (Evanno, Regnaut, & Goudet, 2005) method is represented on the left-hand side. Vertical bars represent individual *P. falciparum* haplotypes, and the colours represent the ancestry co-efficient (Q) for each genetic cluster.

## SUPPLEMENTAL METHODS

**Entomology.** Monthly entomological surveys were undertaken during the wet and dry seasons between February 2013 and September 2015 to monitor the impacts of IRS on the vector population and change in transmission. The main vector in Bongo was *Anopheles gambiae* s.l with limited transmission from *Anopheles funestus*. Pre-IRS, at the peak of the wet-season in August 2013, the daily human biting-rates (HBR; bites/person/night (b/p/n)) were 39.5 b/p/n and 11.4 b/p/n in Vea/Gowrie and Soe, respectively. Post-IRS in August 2015, the daily HBR declined by ~91% and ~99% in Vea/Gowrie (3.5 b/p/n) and Soe (0.1 b/p/n), respectively. The pre-IRS entomological inoculation rates (EIR) (i.e., infective bites/person/month) in August 2013 were 5.9 and 10.7 in Vea/Gowrie and Soe, respectively. After the three-rounds of IRS in August 2015, EIR decreased by ~99% and ~93% in Vea/Gowrie (0 ib/p/n) and Soe (0.8 ib/p/n), respectively (S. Dadzie, M. Appawu, personal communication). These substantial drops in HBR and EIR can be most likely be attributed to the three-rounds of IRS with organophosphates as no other vector control interventions were implemented in Bongo besides long-lasting insecticidal nets (LLINs), which were already widely available prior to the start of this study.

**Var genotyping and estimated multiplicity of infection (MOI).** The hyper-diverse multi-copy *var* gene family encodes the major variant surface antigen of the *P. falciparum* blood stage, called *P. falciparum* erythrocyte membrane protein (PfEMP1). PfEMP1 is the target of naturally acquired immunity to *P. falciparum* and is encoded by ~50-60 *var* genes per genome (Biggs et al., 1991; Gardner et al., 2002; Kyes, Kraemer, & Smith, 2007; Miller, Baruch, Marsh, & Doumbo, 2002; Scherf, Lopez-Rubio, & Riviere, 2008; Smith et al., 1995). The conserved DBL $\alpha$  domain of *var* genes was amplified from gDNA of the pre-IRS (T1) and post-IRS (T2) isolates as described by He et al., (2019) (He et al., 2018) with modifications as described by Ruybal-

Pesántez et al., (2017) (Ruybal-Pesántez et al., 2017). *Var* genotyping was used to infer MOI based on a conservative threshold of 60 unique *var* DBL $\alpha$  types per genome (i.e., isolates with  $\leq 60$  DBL $\alpha$  types were considered single-clone infections). The DBL $\alpha$  sequences and MOI data for the pre- and post-IRS isolates is published in Pilosof et al., (2019) (Pilosof et al., 2019). This *var* genotyping procedure provided a higher resolution to discern and select those asymptomatic *P. falciparum* isolates with an MOI  $\leq 2$ .

**Genetic differentiation.**  $G_{ST}$  was historically thought to be indicative of genetic differentiation, but recent studies have supported that Jost's  $D$  values are a more accurate and robust measure (Gerlach, Jueterbock, Kraemer, Deppermann, & Harmand, 2010; Hedrick, 2005; Jost, 2008) (Jost 2008; Hedrick 2005; Gerlach et al., 2010). In fact, Jost et al. (2018) (Jost et al., 2018) posited that  $G_{ST}$  is a measure of the extent an allele is fixed between population; while Jost's  $D$  can be used for more than one allele per locus and calculates the allelic differentiation between populations. Jost's  $D$  varies from locus to locus as its value depends on the mutation rate of that locus. Jost's  $D$  weighs alleles according to the square of their relative frequencies and therefore measures the differentiation of the most common alleles. Jost's  $D$  is independent of within-group diversity and is more robust to variations in population size. A high value of Jost's  $D$  indicates that the most common alleles are not shared.

## REFERENCES.

- Biggs, B. A., Gooze, L., Wycherley, K., Wollish, W., Southwell, B., Leech, J. H., & Brown, G. V. (1991). Antigenic variation in *Plasmodium falciparum*. *PNAS*, *88*, 9171–9174.
- Evanno, G., Regnaut, S., & Goudet, J. (2005). Detecting the number of clusters of individuals using the software STRUCTURE: a simulation study. *Molecular Ecology*, *14*, 2611–2620.
- Gardner, M. J., Hall, N., Fung, E., White, O., Berriman, M., Hyman, R. W., ... Barrell, B. (2002). Genome sequence of the human malaria parasite *Plasmodium falciparum*. *Nature*, *419*(6906), 498–511. <https://doi.org/10.1038/nature01097>
- Gerlach, G., Jueterbock, A., Kraemer, P., Deppermann, J., & Harmand, P. (2010). Calculations of population differentiation based on GST and D: Forget GST but not all of statistics! *Molecular Ecology*, *19*(18), 3845–3852. <https://doi.org/10.1111/j.1365-294X.2010.04784.x>
- He, Q., Piloosof, S., Tiedje, K. E., Ruybal-Pesántez, S., Artzy-Randrup, Y., Baskerville, E. B., ... Pascual, M. (2018). Networks of genetic similarity reveal non-neutral processes shape strain structure in *Plasmodium falciparum*. *Nature Communications*, *9*(1), 1817. <https://doi.org/10.1038/s41467-018-04219-3>
- Hedrick, P. W. (2005). A standardized genetic differentiation measure. *Evolution; International Journal of Organic Evolution*, *59*(8), 1633–1638. <https://doi.org/10.1554/05-076.1>
- Jost, L. (2008). G(ST) and its relatives do not measure differentiation. *Molecular Ecology*, *17*(18), 4015–4026. <https://doi.org/10.1111/j.1365-294X.2008.03887.x>
- Jost, L., Archer, F., Flanagan, S., Gaggiotti, O., Hoban, S., & Latch, E. (2018). Differentiation measures for conservation genetics. *Evolutionary Applications*, *11*(7), 1139–1148. <https://doi.org/10.1111/eva.12590>
- Kyes, S. A., Kraemer, S. M., & Smith, J. D. (2007). Antigenic variation in *Plasmodium falciparum*: Gene organization and regulation of the var multigene family. *Eukaryotic Cell*, *6*, 1511–1520. <https://doi.org/10.1128/EC.00173-07>
- Miller, L. H., Baruch, D. I., Marsh, K., & Doumbo, O. K. (2002). The pathogenic basis of malaria. *Nature*, *415*(6872), 673–679. <https://doi.org/10.1038/415673a>
- Piloosof, S., He, Q., Tiedje, K. E., Ruybal-Pesántez, S., Day, K. P., & Pascual, M. (2019). Competition for hosts modulates vast antigenic diversity to generate persistent strain structure in *Plasmodium falciparum*. *PLOS Biology*, *17*(6), e3000336. <https://doi.org/10.1371/journal.pbio.3000336>
- Ruybal-Pesántez, S., Tiedje, K. E., Tonkin-Hill, G., Rask, T. S., Kanya, M. R., Greenhouse, B., ... Day, K. P. (2017). Population genomics of virulence genes of *Plasmodium falciparum* in clinical isolates from Uganda. *Scientific Reports*, *7*(1), 11810. <https://doi.org/10.1038/s41598-017-11814-9>
- Scherf, A., Lopez-Rubio, J. J., & Riviere, L. (2008). Antigenic variation in *Plasmodium falciparum*. *Annual Review of Microbiology*, *62*(2), 445–470. <https://doi.org/10.1146/annurev.micro.61.080706.093134>
- Smith, J. D., Chitnis, C. E., Craig, A. G., Roberts, D. J., Hudson-Taylor, D. E., Peterson, D. S., ... Miller, L. H. (1995). Switches in expression of *Plasmodium falciparum* var genes correlate with changes in antigenic and cytoadherent phenotypes of infected erythrocytes. *Cell*, *82*(1), 101–110. [https://doi.org/10.1016/0092-8674\(95\)90056-X](https://doi.org/10.1016/0092-8674(95)90056-X)
